# Supplementary material
Source: publisher site journal article supplement (https://www.dovepress.com/article/567783)
Supplement: Supplementary file 1 [file 567783%20Additional%20file%201_1.docx]

**Additional file 1： Variable Assignments in Logistic Regression Analysis**

| **Variable Category** | **Variable Name** | **Variable Values** |
| --- | --- | --- |
| Independent Variable | Age | Age was entered the model as a continuous variable. |
| Gender | Male = 1, Female = 2 |
| Marital Status | Married = 1, Unmarried = 2, Divorced = 3, Widowed = 4 |
| Comorbid Hypertension | Yes = 1, No = 0 |
| Serum Albumin | Serum Albumin was entered the model as a continuous variable. |
| Glomerular Filtration Rate | Glomerular Filtration Rate was entered the model as a continuous variable. |
| Serum Creatinine | Serum Creatinine was entered the model as a continuous variable. |
| Triglycerides | Triglycerides was entered the model as a continuous variable. |
| Anxiety | Yes = 1, No = 0 |
| Depression | Yes = 1, No = 0 |
| Dependent Variable | Malnutrition | Yes = 1, No = 0 |
